# Supplementary material
Source: MDPI journal article supplement (https://www.mdpi.com/2076-3417/13/17/9920)
Supplement: s1 [file s1 › applsci-2520743-supplementary.pdf]

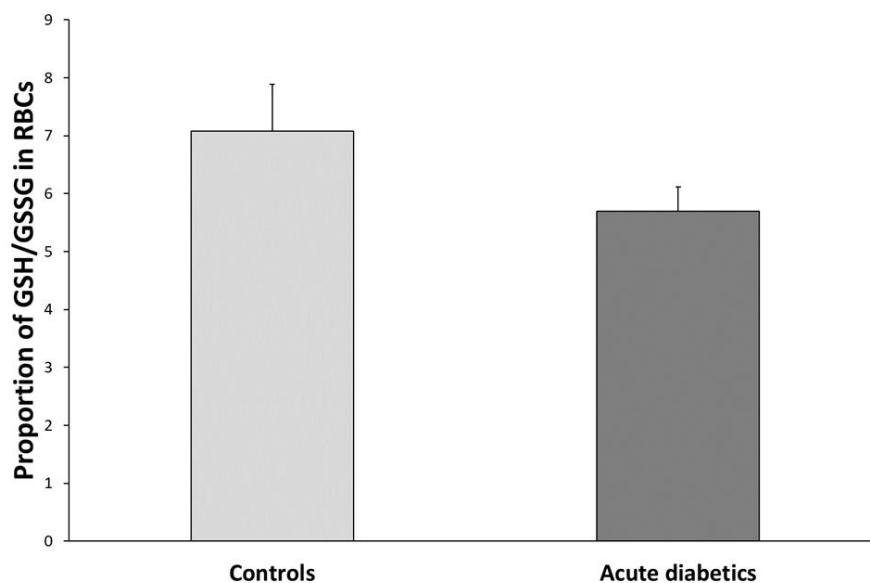

**Figure S1.** The ratio of reduced/oxidized glutathione (GSH/GSSG) in the RBC population of acute diabetic and control rats.

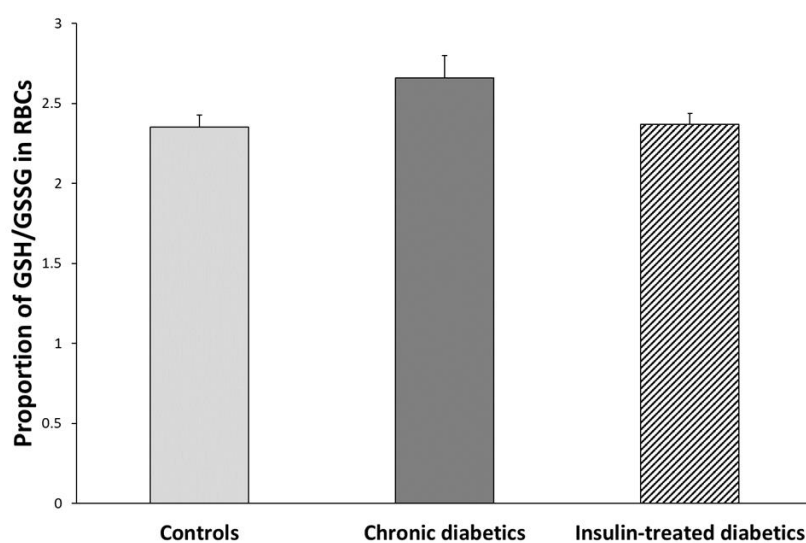

**Figure S2.** The ratio of reduced/oxidized glutathione (GSH/GSSG) in the RBC population of chronic diabetic, insulin-treated diabetic, and control rats.
